# Supplementary material for: Selective expression of claudin-5 in thymic endothelial cells regulates the blood–thymus barrier and T-cell export
Source: PubMed Central journal article supplement — Int Immunol. 2020 Oct 10;33(3):171–82. doi: 10.1093/intimm/dxaa069 (PMC7936066; doi:10.1093/intimm/dxaa069), 2020-10-10
Supplement: dxaa069_suppl_supplementary_figures.pdf [file dxaa069_suppl_supplementary_figures.pdf]

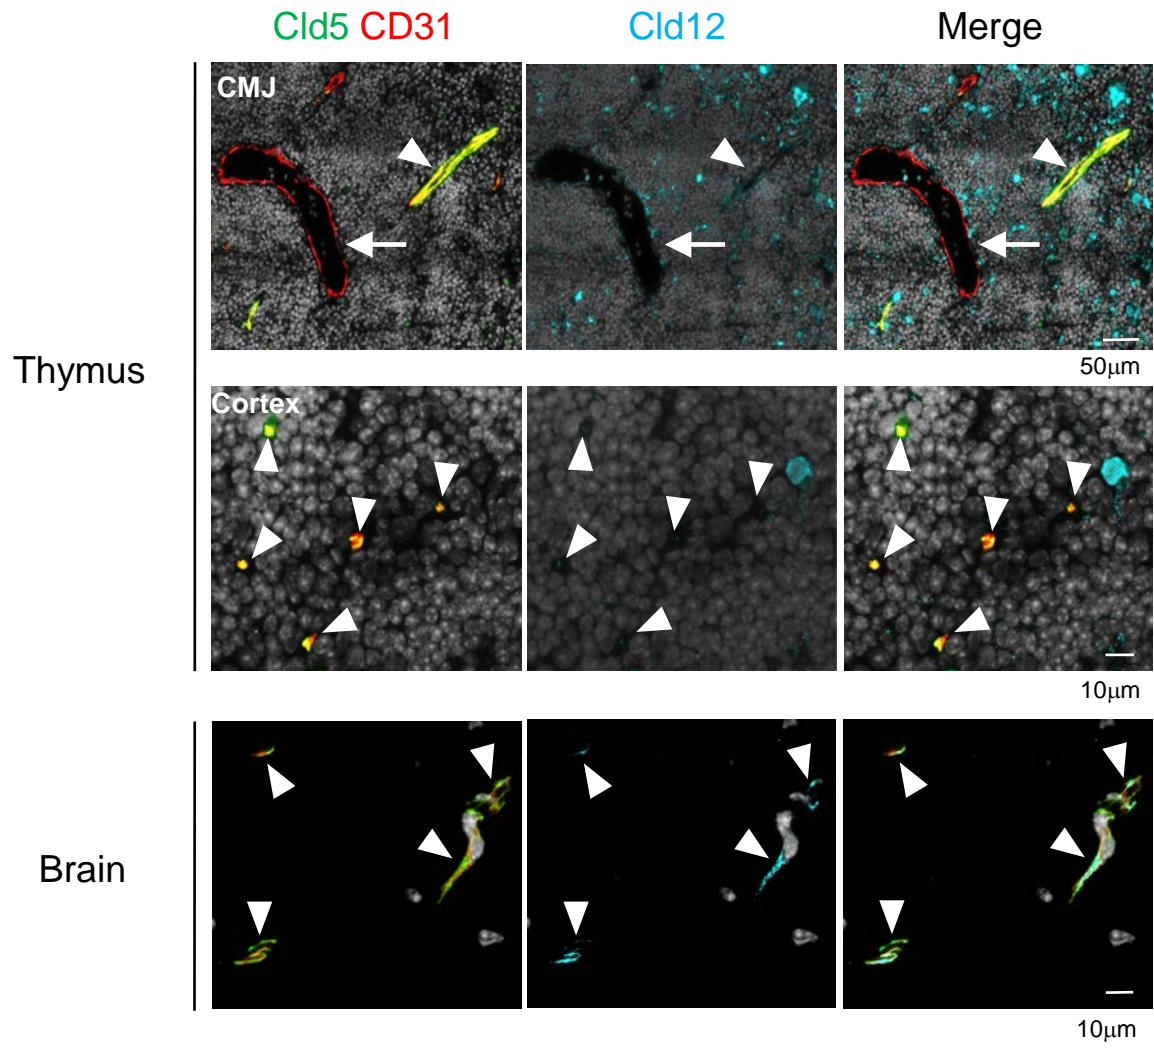

Supplemental Figure 1

## Medulla & CMJ

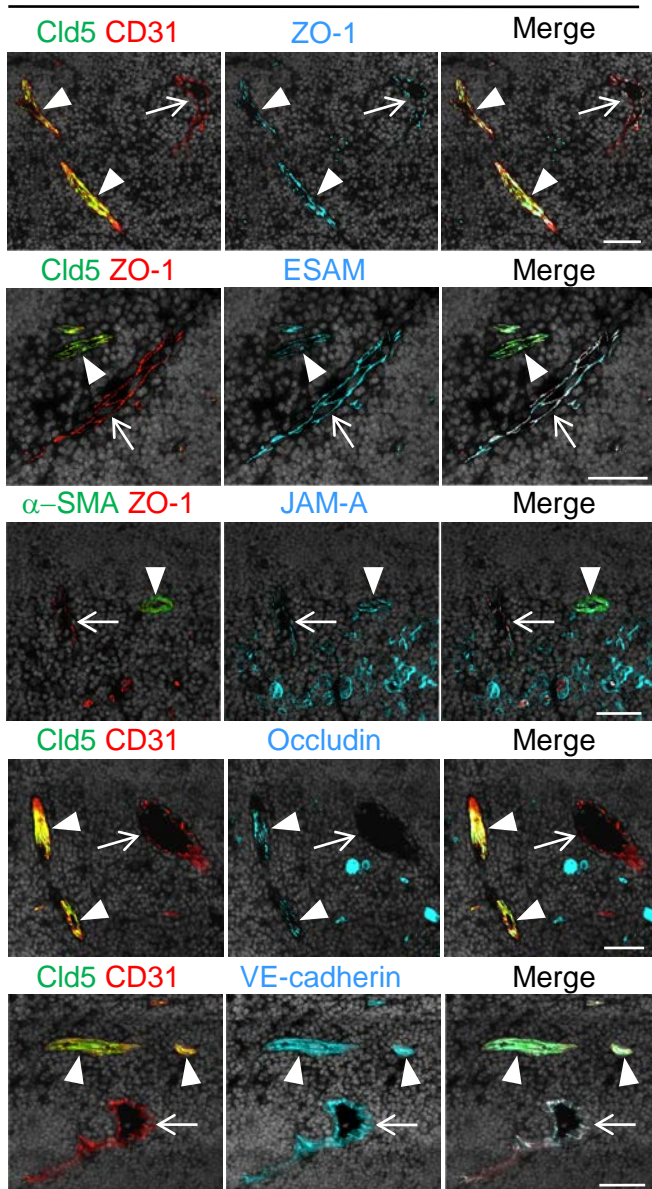

## Cortex

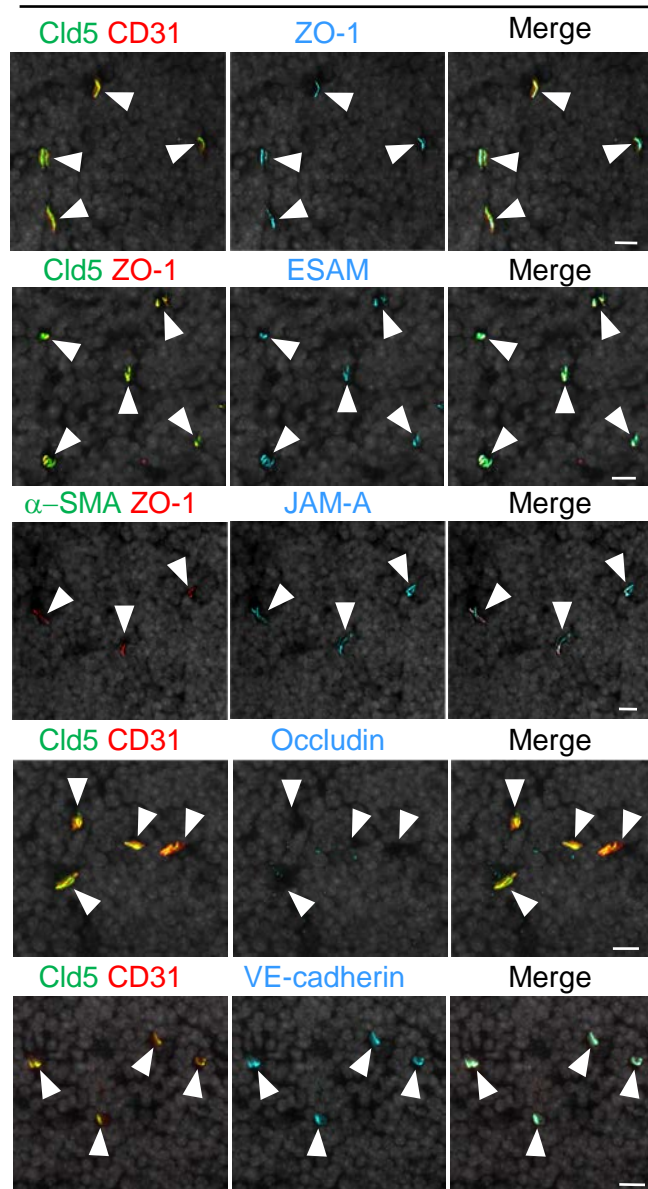

| Location         | Morphology   | Smooth muscles | Junctional molecules |      |     |      |      |       |       |
|------------------|--------------|----------------|----------------------|------|-----|------|------|-------|-------|
|                  |              |                | TJ                   |      |     |      |      | AJ    |       |
|                  |              |                | $\alpha$ -SMA        | Cld5 | Occ | ZO-1 | ESAM | JAM-A | Cld12 |
| Medulla and CMJs | Arterioles   | High           | +                    | +    | +   | +    | +    | -     | +     |
| Medulla and CMJs | Venules/PCVs | Low            | -                    | -    | +   | +    | +    | -     | +     |
| Cortex           | Capillaries  | -              | +                    | -    | +   | +    | +    | -     | +     |

Cld5 CD31

E14.5

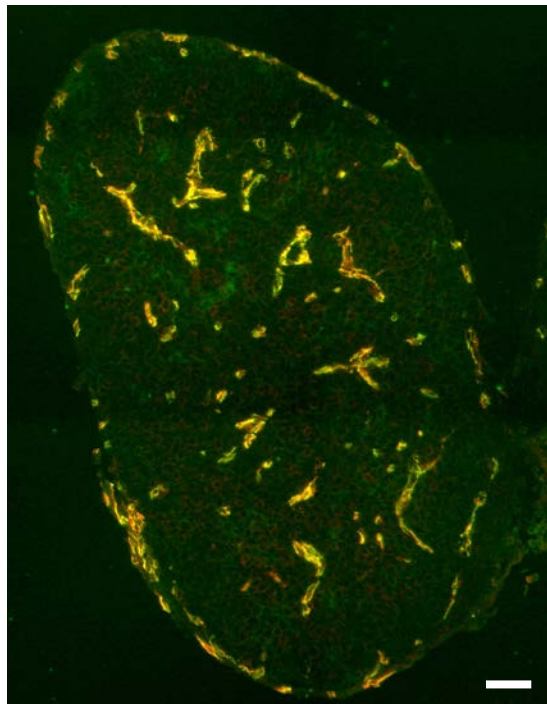

E16.5

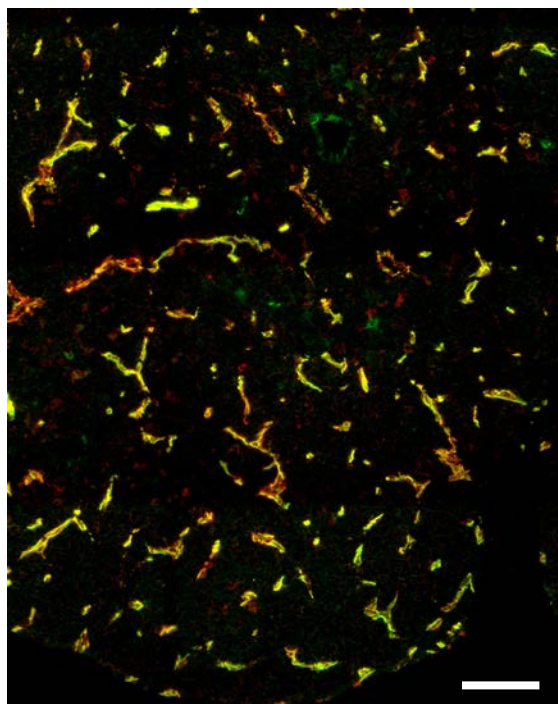

E18.5

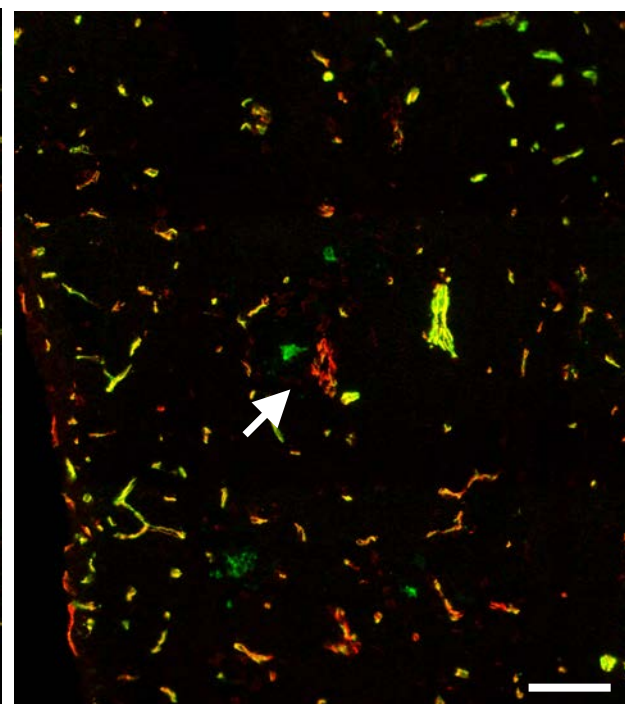

Bars, 100 $\mu$ m

Supplemental  
Figure 4



**A**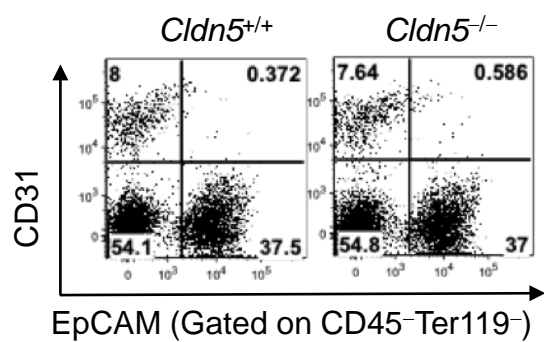**B**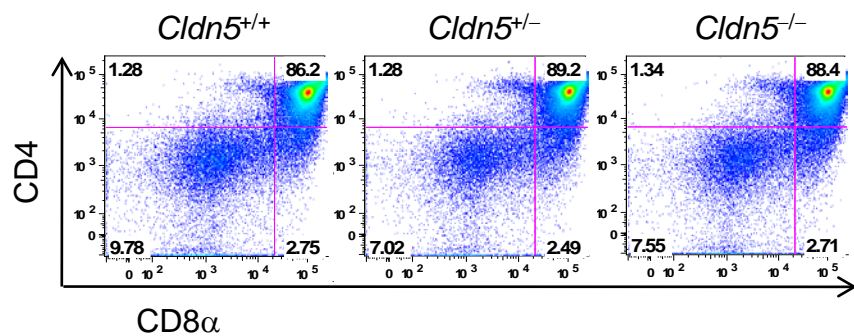**C**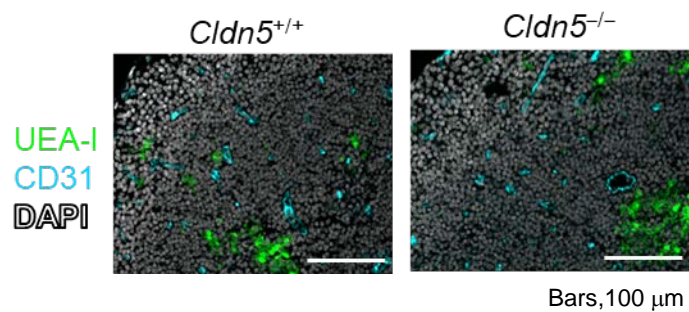

Cld5 CD31 Laminin DAPI

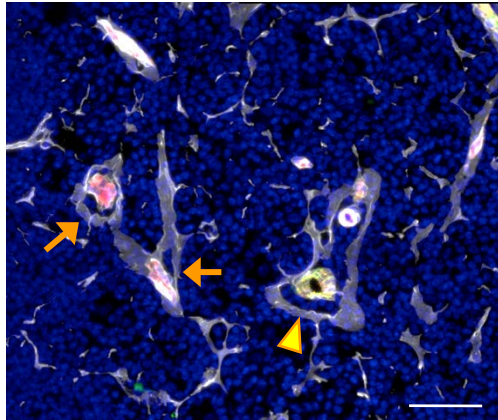

Cld5 CD31 Collagen IV DAPI

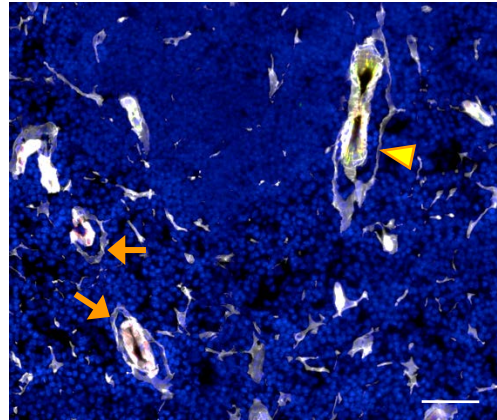

Bars, 50 $\mu$ m

Supplemental  
Figure 6

**Establishment of  
Blood-Thymus Barrier**

**Gateway to  
Blood Circulation**

**Cortex**

**Cortico-Medullary Junction**

**Medulla**

**Claudin-5<sup>+</sup>**

**Claudin-5<sup>+</sup>**

**Claudin-5<sup>-</sup>**

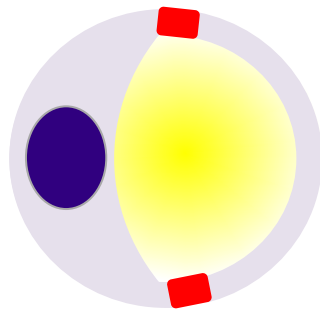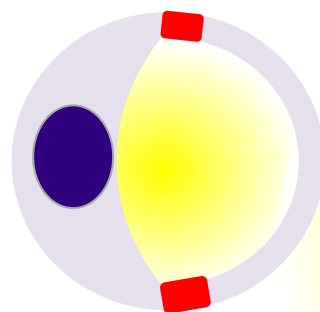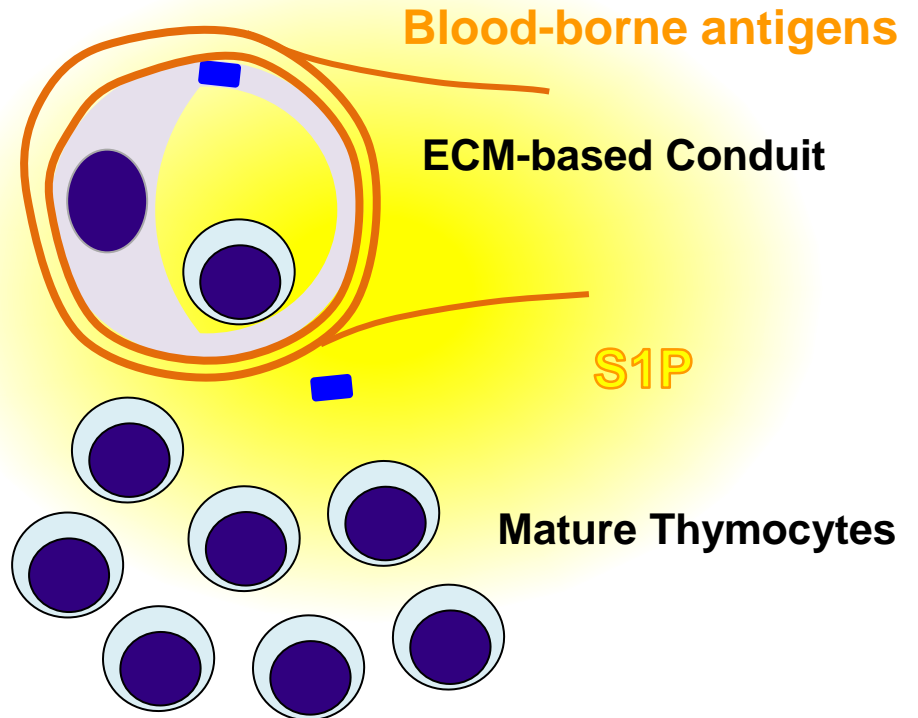

**Endothelial  
cells**

**Mature Thymocytes**
